# Supplementary material for: Selective photo-oxidative coupling of amines to form C–N bonds using post synthetic modification of MIL-68-NH2 with metal acetylacetonate
Source: Royal Society of Chemistry journal article supplement (doi:10.1039/d3nj02852f), 2023-01-01
Supplement: d3nj02852f1.pdf [file d3nj02852f1.pdf]

### Supporting information's

#### Selective photo-oxidative coupling of amines to form C-N bond using post synthetic modification of MIL-68-NH<sub>2</sub> with metal acetylacetonate

Mahmoud El-Shahat<sup>a\*</sup>, Ahmed R. Wassef<sup>b</sup>, Reda M. Abdelhameed<sup>c\*</sup>

<sup>a</sup>Photochemistry Department, Chemical Industries Research Institute, National Research Centre, Scopus affiliation ID 60014618, 33 EL Buhouth St., Dokki, Giza 12622, Egypt. E-mail address: [mahmoudelshahat@gmail.com](mailto:mahmoudelshahat@gmail.com)

<sup>b</sup>Electron Microscope and Thin Film Department, Physics Research Institute, National Research Center, 33 El-Bohouth St., Dokki, Giza 12622, Egypt.

<sup>c</sup>Applied Organic Chemistry Department, Chemical Industries Research Institute, National Research Centre, Scopus affiliation ID 60014618, 33 EL Buhouth St., Dokki, Giza, 12622, Egypt. E-mail address: [reda\\_nrc@yahoo.com](mailto:reda_nrc@yahoo.com).

Table S1: Metal contents (%) and elemental analysis for the modified MOFs.

| Sample                 | In              | Ni         | Co         | Fe         | C     | H    | N    |
|------------------------|-----------------|------------|------------|------------|-------|------|------|
| MIL-68-NH <sub>2</sub> | 37.04±<br>0.42  | --         | --         | --         | 31.00 | 1.63 | 4.52 |
| MIL-68-AC-Ni           | 34.12±<br>0.61  | 3.49± 0.04 | --         | --         | 32.13 | 1.38 | 4.16 |
| MIL-68-AC-Co           | 34.12 ±<br>0.02 | --         | 3.50± 0.05 | --         | 32.12 | 1.38 | 4.16 |
| MIL-68-AC-Fe           | 34.18±<br>0.57  |            |            | 3.32± 0.02 | 32.18 | 1.38 | 4.17 |

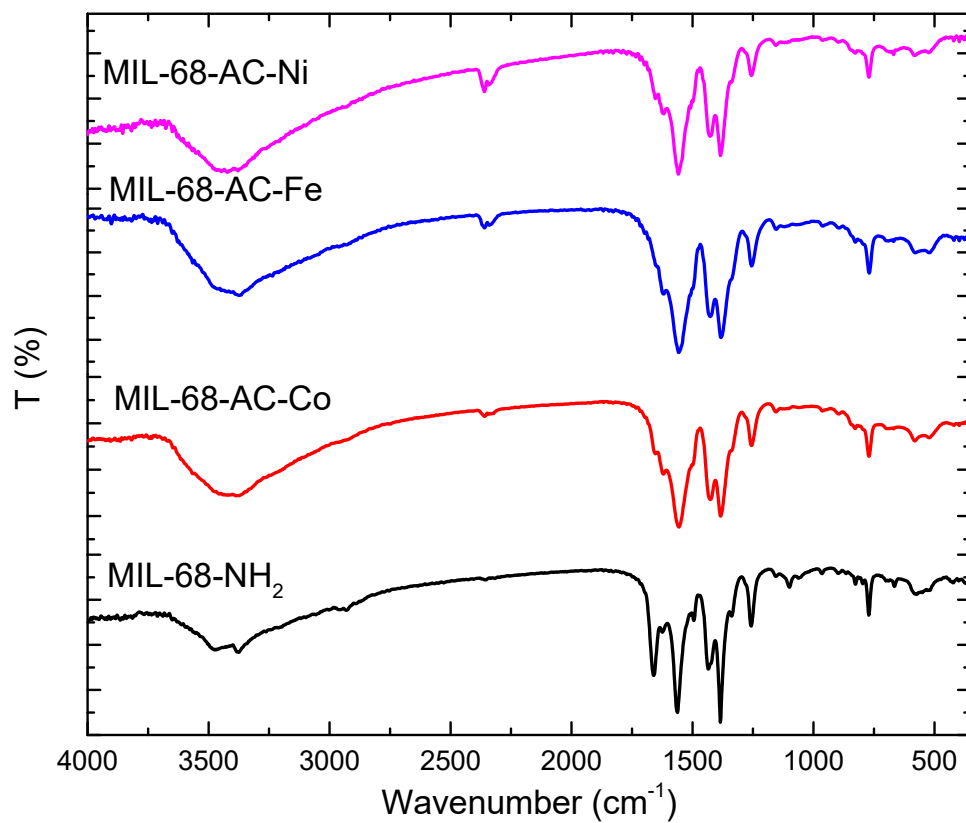

Figure S1. FTIR of MIL-68-NH<sub>2</sub>, MIL-68-AC-Co, MIL-68-Ac-Fe and MIL-68-AC-Ni

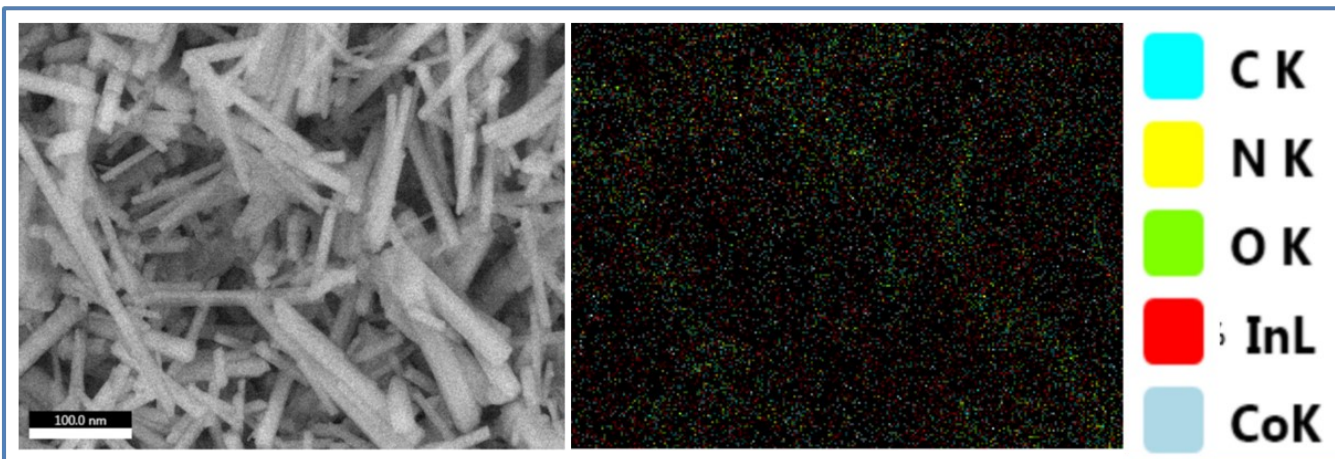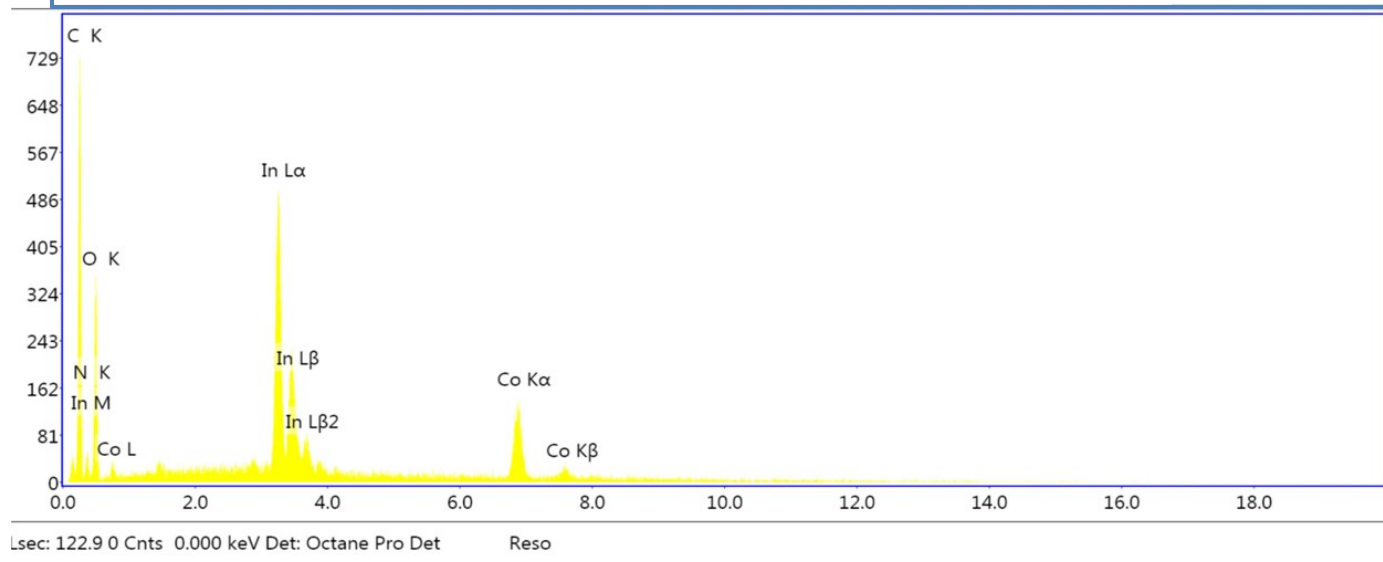

Figure S2 EDX and SEM-mapping of MIL-68-AC-Co

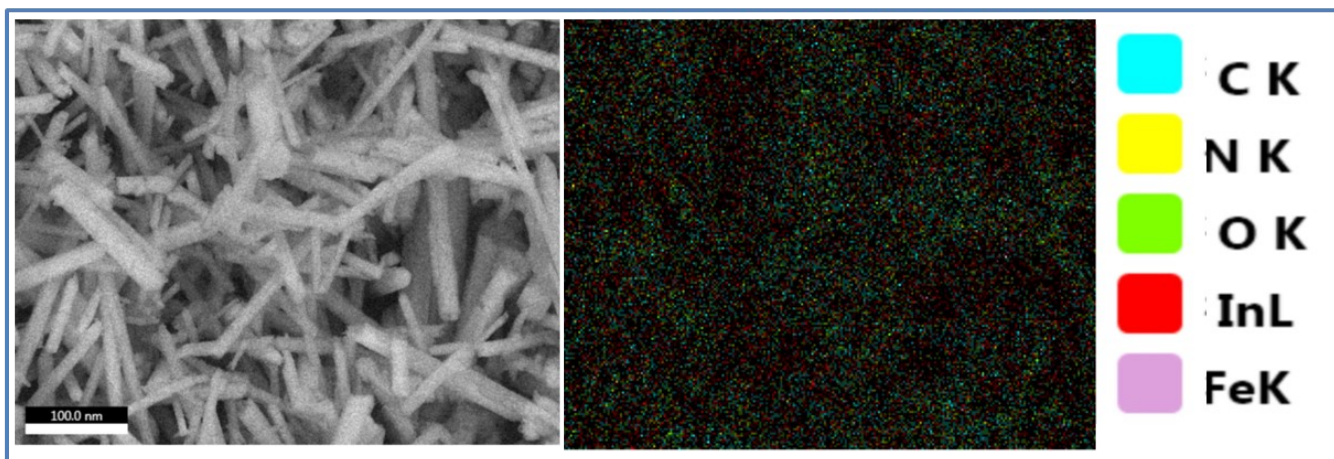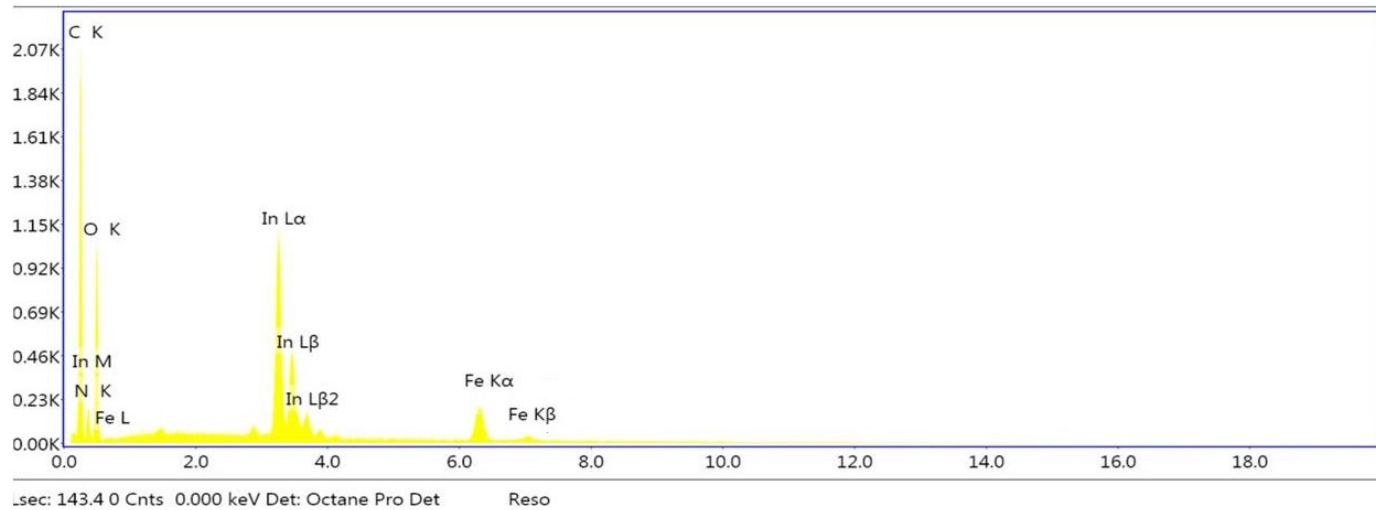

Figure S3 EDX and SEM-mapping of MIL-68-AC-Fe

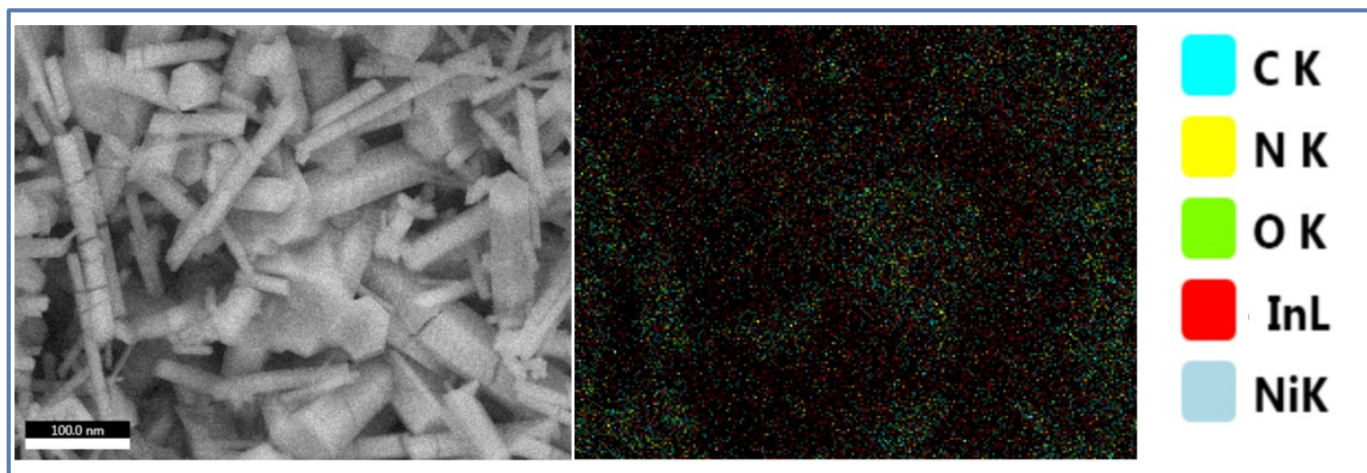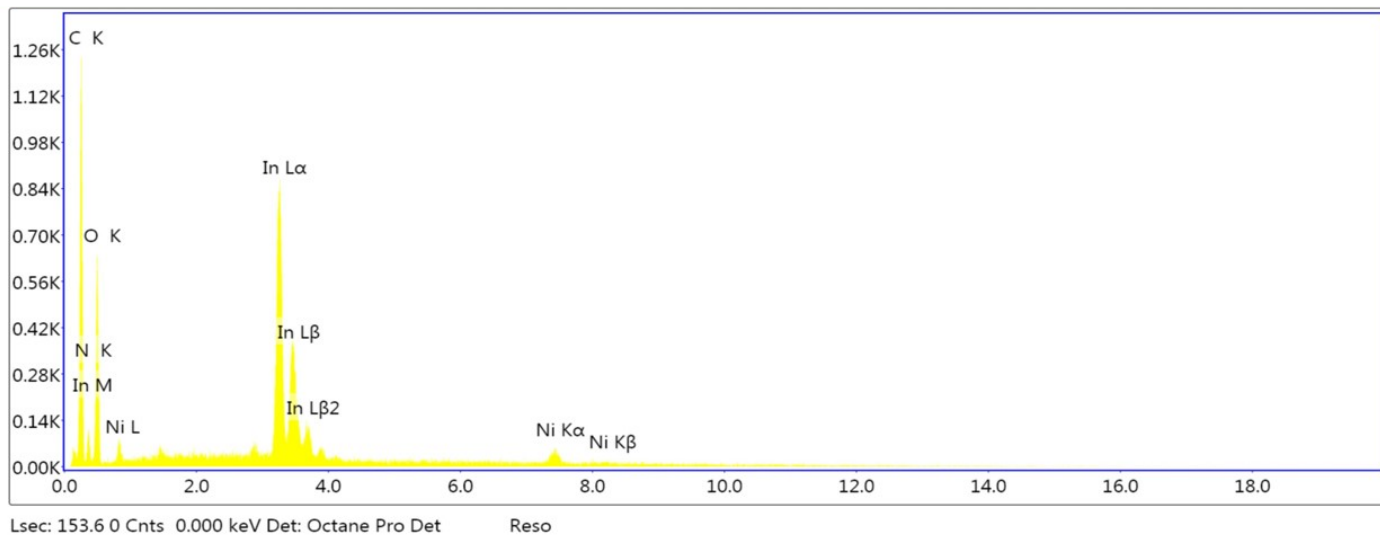

Figure S4 EDX and SEM-mapping of MIL-68-AC-Ni

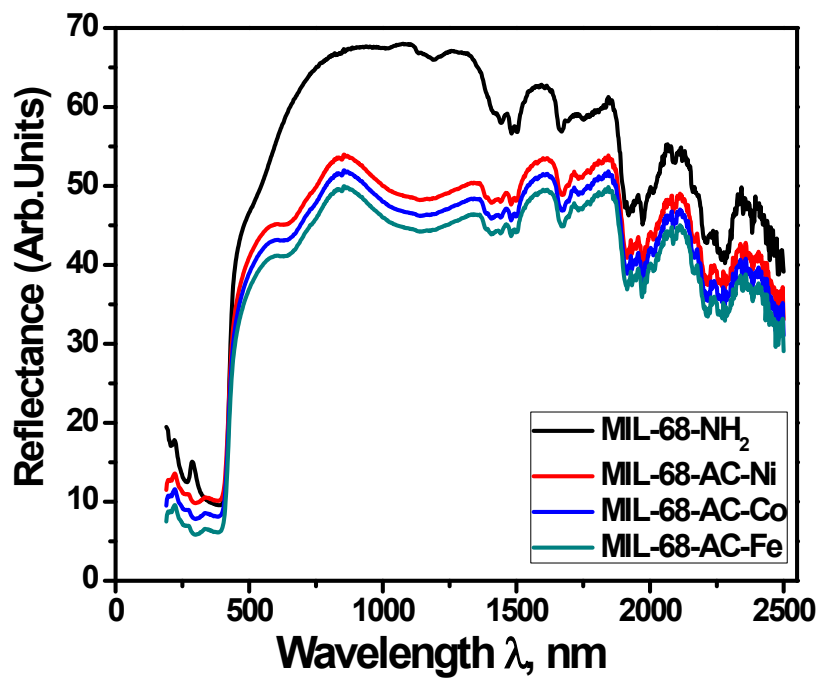

Figure S5. UV-VIS DRS of MIL-68-NH<sub>2</sub>, MIL-68-AC-Ni, MIL-68-AC-Co, and MIL-68-AC-Fe

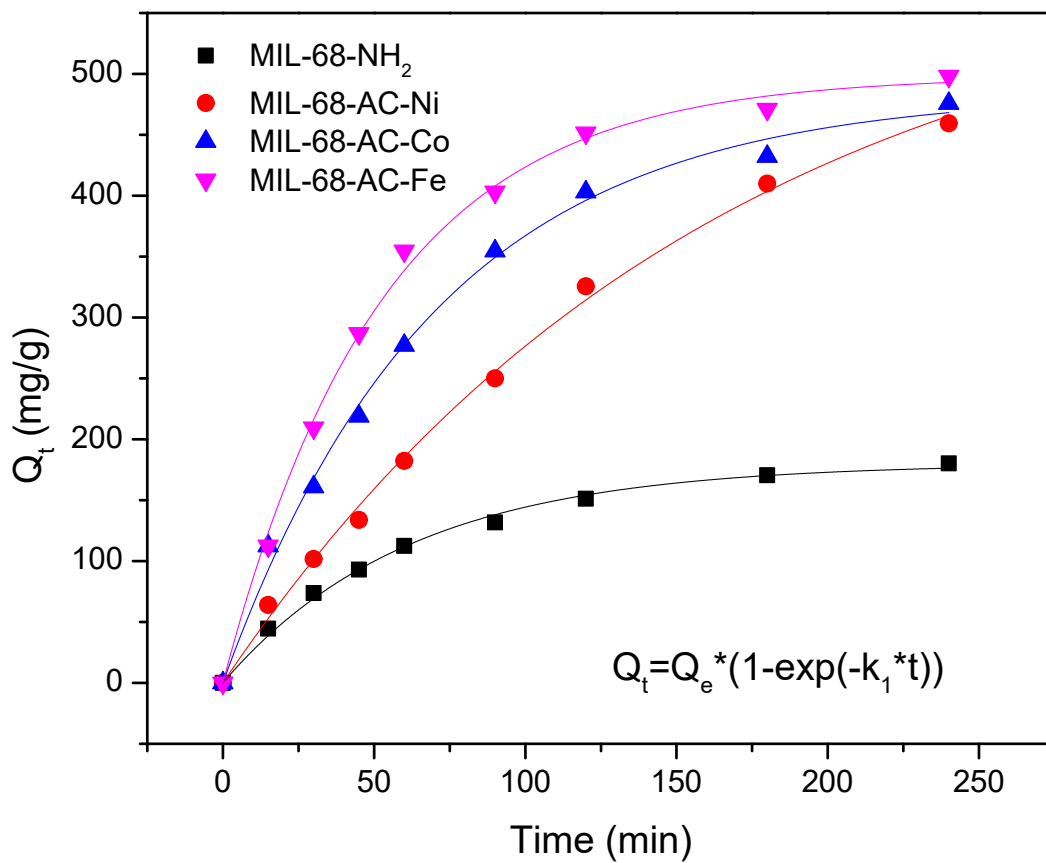

Figure S6. The fitting with non-linear first order model

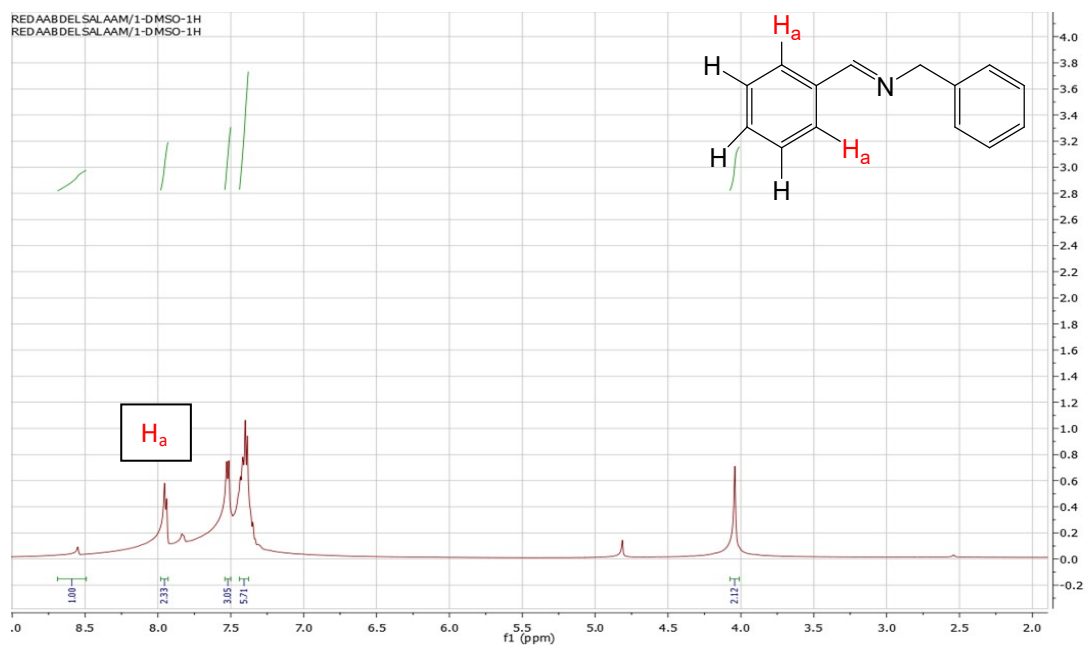

Figure S7. <sup>1</sup>H NMR of N-(Benzylidene)benzylamine

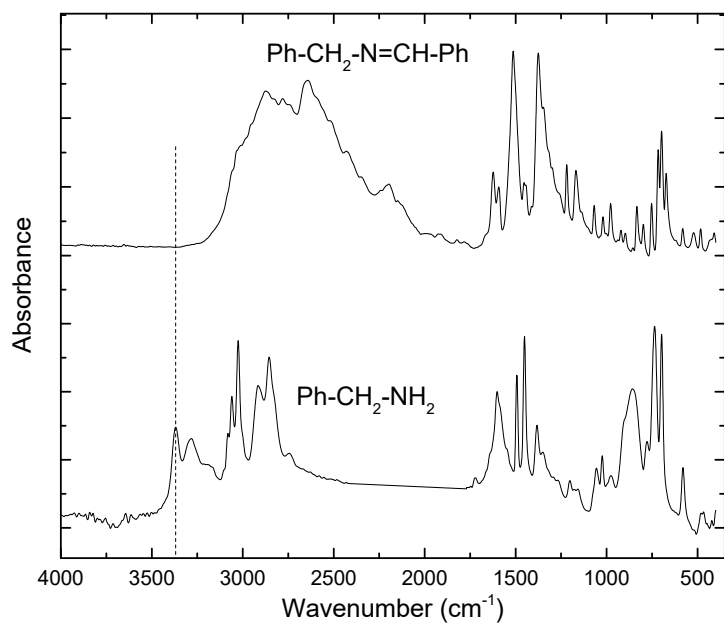

Figure S8. FTIR of self-coupling benzylamine

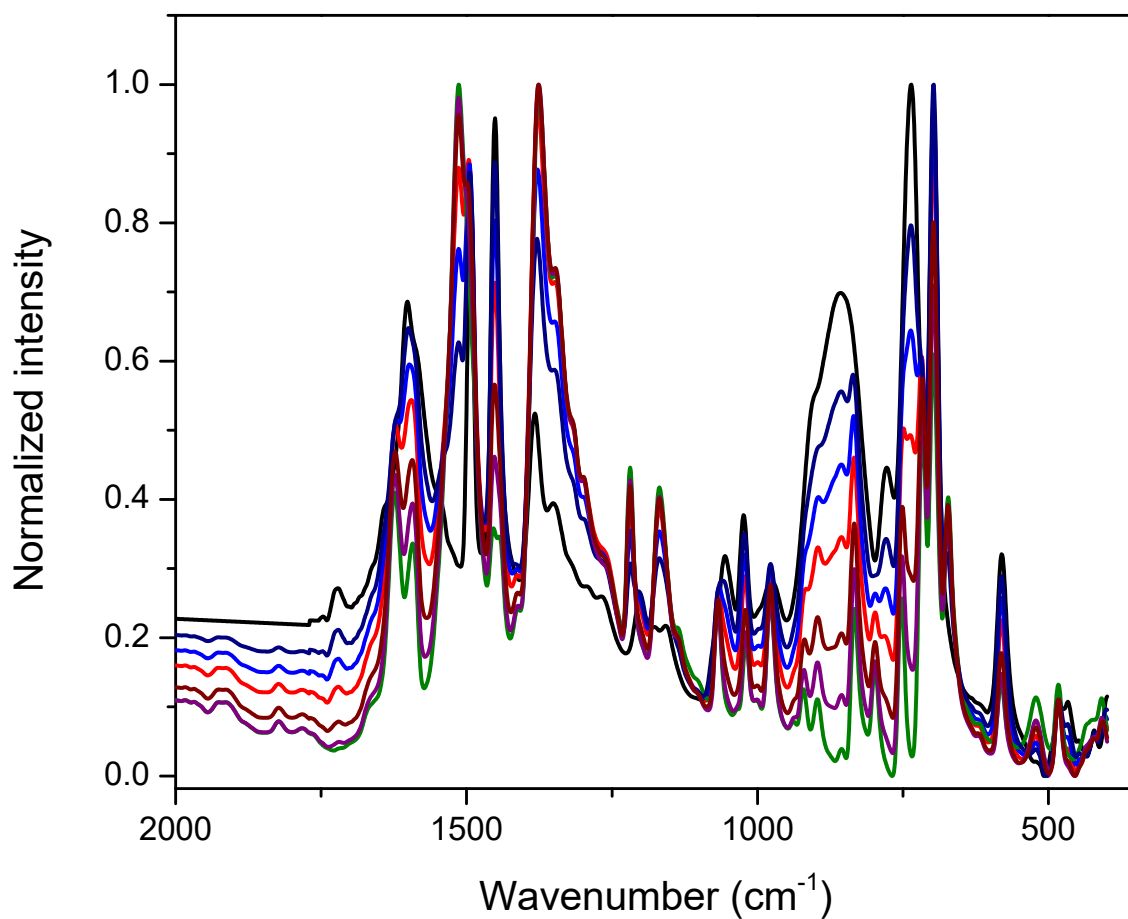

Figure S9. FTIR of self-coupling benzylamine
